# Supplementary material for: Establishment of induced pluripotent stem cells from normal B cells and inducing AID expression in their differentiation into hematopoietic progenitor cells
Source: PubMed Central journal article supplement (PMC5431994; doi:10.1038/s41598-017-01627-1), 2017-05-10

1 **Supplemental Information**

2  
3 Establishment of induced pluripotent stem cells from normal B cells and inducing AID  
4 expression in their differentiation into hematopoietic progenitor cells

5  
6 Fumihiko Kawamura<sup>1</sup>, Makoto Inaki<sup>2</sup>, Atsushi Katafuchi<sup>1</sup>, Yu Abe<sup>1</sup>, Naohiro Tsuyama<sup>1</sup>,  
7 Yumiko Kurosu<sup>1</sup>, Aki Yanagi<sup>1</sup>, Mitsunori Higuchi<sup>3</sup>, Satoshi Muto<sup>3</sup>, Takumi Yamaura<sup>3</sup>,  
8 Hiroyuki Suzuki<sup>3</sup>, Hideyoshi Noji<sup>4</sup>, Shinichi Suzuki<sup>5</sup>, Mitsuaki A Yoshida<sup>6</sup>, Megumi  
9 Sasatani<sup>7</sup>, Kenji Kamiya<sup>7</sup>, Masafumi Onodera<sup>2</sup>, Akira Sakai<sup>1</sup>

10  
11 <sup>1</sup>Dept. of Radiation Life Sciences, Fukushima Medical University School of Medicine,  
12 Fukushima, Japan

13 <sup>2</sup>Dept. of Genetics, National Research Institute for Child Health and Development,  
14 Tokyo, Japan

15 <sup>3</sup>Dept. of Regenerative Surgery, Fukushima Medical University School of Medicine,  
16 Fukushima, Japan

17 <sup>4</sup>Dept. of Medical Oncology, Fukushima Medical University School of Medicine,  
18 Fukushima, Japan

19 <sup>5</sup>Dept. of Thyroid and Endocrinology, Fukushima Medical University School of  
20 Medicine, Fukushima, Japan

21 <sup>6</sup>Dept. of Radiation Biology, Institute of Radiation Emergency Medicine, Hirosaki  
22 University, Hirosaki, Japan

23 <sup>7</sup>Dept. of Experimental Oncology, Research Institute for Radiation Biology and  
24 Medicine, Hiroshima University, Hiroshima, Japan

25  
26 *Correspondence:*

27 Akira Sakai, M.D., Ph.D.

28 Dept. of Radiation Life Sciences

29 Fukushima Medical University School of Medicine

30 1 Hikarigaoka, Fukushima, 960-1295 Japan

31 TEL: +81-24-547-1703

32 FAX: +81-24-547-1704

33 E-mail: sakira@fmu.ac.jp

34

## Materials and Methods

35

### 36 Plasmid construction

37 The retroviral vector GCsap (myeloproliferative sarcoma virus (MPSV)) was  
38 generated by deleting the *NcoI* site in GCsap (MPSV).<sup>1</sup> The open reading frames of human  
39 *Oct3/4*, *Sox2*, *Klf4*, and *c-Myc* were amplified from pMXs-h*Oct3/4*, pMXs-h*Sox2*, pMXs-h*Klf4*,  
40 and pMXs-h*c-Myc*, retrospectively, using RT-PCR.<sup>2</sup> PCR products were digested with *NotI* and  
41 *BamHI* and cloned into GCsap (MPSV).

42 The lentiviral vector pRRL sin hEF1a-h*CD40L*-IRES-KO-cPPT was constructed via  
43 the following procedures: the hEF1a promoter was amplified by genomic-PCR using the  
44 primers 5'- AACGCTAGCGGCTCCGGTGCCCGTCA-3' (Forward primer with an *NheI* site)  
45 and 5'- GACGATATCGAATTCGGATCCTCACGACACCTGAAATGGAA-3' (Reverse primer  
46 with a *BamHI* site and an *EcoRI* site). The genomic DNA of Jurkat was used as the PCR  
47 template. The PCR products were digested with *EcoRI* and phosphorylated with T4  
48 polynucleotide kinase (NEB, Tokyo, Japan). The DNA fragments were then ligated into pRRL  
49 sin hCMV-MCS-cPPT digested with *HpaI* and *EcoRI* to generate pRRL sin hEF1a-MCS. The  
50 ligated plasmids were transformed into the Stbl3 strain of *Escherichia coli* (Life Technologies,

51 Funabashi, Japan).

52 The cPPT sequence was amplified by PCR using the primers 5'-  
53 CTAGTCTAGATTTTAAAAGAAAAGGGGGGATTG -3' (Forward primer with an *XbaI* site)  
54 and 5'- GGAATTCCTAGCTAGCAAAATTTTGAATTTTGTAAATTTGTTT -3' (Reverse  
55 primer with an *NheI* site). pRRL sin hCMV-MCS-cPPT was used as the PCR template. The  
56 PCR products were digested with *XbaI* and *NheI*. The DNA fragments were then ligated into  
57 pRRL sin hEF1a-MCS digested with *NheI* to generate pRRL sin hEF1a-MCS-cPPT.

58 The IRES-Kusabira-Orange (IRES-KO) sequence was amplified by PCR using the  
59 primers: 5'-CCCTCAAAGTAGACGGCATCGC—3' (Forward primer) and 5'-  
60 GGATATCCTTAGCAGTGGGCCACGGCGT—3' (Reverse primer with an *EcoRV* site). A  
61 retroviral vector pGCDN-IRES-KO was used as the PCR template. The PCR products were  
62 digested with *EcoRI* and *EcoRV*. The DNA fragments were then ligated into pRRL sin  
63 hEF1a-MCS-cPPT digested with *EcoRI* and *EcoRV* to generate pRRL sin  
64 hEF1a-MCS-IRES-KO-cPPT.

65 To modify the multi-cloning site (MCS), pRRL sin hEF1a-MCS-IRES-KO-cPPT was  
66 digested with *BamHI* and *EcoRI*, and treated with bacterial alkaline phosphatase (TaKaRa,

67 Kusatsu, Japan). Subsequently, 5  $\mu$ l of each of the synthesized sense and antisense  
68 oligonucleotides (100  $\mu$ M each) were mixed with 40  $\mu$ l of 150 mM NaCl, denatured at 95  $^{\circ}$ C  
69 for 3 min and annealed by cooling to 37  $^{\circ}$ C for 2 h. The following oligonucleotides were used:  
70 5'- GATCGGAATTCTCTAGAGGATCCC-3' (sense oligonucleotides with an *Eco*RI site, an  
71 *Xba*I site and a *Bam*HI site) and 5'- AATTGGGATCCTCTAGAGAATTCC-3' (antisense  
72 oligonucleotides). The annealed oligonucleotides were phosphorylated by T4 polynucleotide  
73 kinase (Takara) and ligated into the digested pRRL sin hEF1a-MCS-IRES-KO-cPPT to generate  
74 pRRL sin hEF1a-MCS2-IRES-KO-cPPT.

75 Human *CD40L* (*hCD40L*) was amplified by RT-PCR using the primers: 5'-  
76 GCTCTAGACACCCATGATCGAAACATACAACCAAAC-3' (Forward primer with an *Xba*I  
77 site) and 5'- CGGGATCCTCAGAGTTTGAGTAAGCCAAAG-3' (Reverse primer with a  
78 *Bam*HI site). The cDNA of human activated T cells was used as the RT-PCR template. The  
79 PCR products were digested with *Xba*I and *Bam*HI. The DNA fragments were then ligated into  
80 pRRL sin hEF1a-MCS2-IRES-KO cPPT to generate pRRL sin  
81 hEF1a-*hCD40L*-IRES-KO-cPPT.

82 pEF-1 $\alpha$  Tet-Off-IRES neo was constructed as follows. The tTA2<sup>S</sup>-IRES neo DNA  
83 fragment was PCR amplified using the pRetroX-Tet-Off Advanced vector as a template

84 (Clontech, Mountain View, CA, USA), KOD plus DNA polymerase (TOYOBO, Osaka, Japan)  
85 and the primers: tTA IRES neo-XbaI/F2, 5'-ACTCTAGAACCATGTCAAGACTGGAC-3' and  
86 tTA IRES neo-XbaI/R2, 5'-CCTCTAGATGGGTGGTGAGCAGCTC-3'. The DNA amplimer  
87 was digested with XbaI and cloned into the XbaI site of pEF-BOS. pEF-1 $\alpha$  Tet-Off-IRES neo  
88 was then transfected into BiPSC-13 and MIB2-6 cells using ViaFect (Promega, Madison, WI,  
89 USA) according to the manufacturer's instructions. G418 resistant cells of both cell lines were  
90 isolated and used for further doxycycline-controlled activation-induced cytidine deaminase  
91 (AID) expression.

92

### 93 **Establishment of the PG13/OSKMG cell line**

94           The Retroviral producing cell line (PG13/OSKMG) was established as follows: First,  
95 the retroviral plasmid described above or GCsapEGFP (MPSV)<sup>1</sup> was cotransfected with the  
96 10A1 env expression plasmid (pCL-10A1) into 293gp cells by CaPO<sub>4</sub> coprecipitation. The  
97 293gp cells were cultured in DMEM-high glucose (Nacalai Tesque, Kyoto, Japan)  
98 supplemented with 10% FBS (Equitech-Bio, Kerrville, TX, USA), 1 mM sodium pyruvate  
99 (Thermo Fisher Scientific, Yokohama, Japan), 50 U/ml Penicillin and 50  $\mu$ g/ml Streptomycin  
100 (Nacalai Tesque) at 37°C in 10% CO<sub>2</sub>. The supernatant from the transfected 293gp cells was  
101 harvested and filtered (0.45  $\mu$ m pore-size, Millipore, Merck Millipore, Darmstadt, Germany).

102 The filtered supernatant was concentrated by PEG precipitation (see below under  
103 “Concentration of PG13 retrovirus”) <sup>3</sup> and resuspended in serum-free DMEM-high glucose  
104 medium. The concentrated retrovirus was used to transduce PG13 cells to express the  
105 GaLV-envelope. The PG13 cells were cultured in DMEM-high glucose supplemented with 10%  
106 FBS, 50 U/ml Penicillin and 50 µg/ml Streptomycin (D10 medium) at 37°C in 10%CO<sub>2</sub>.  
107 Transduction was performed three times, each time by spin-infection (1000×g, 1 h) in the  
108 presence of 8 µg/ml polybrene (Nacalai Tesque, Kyoto, Japan) and 20 mM HEPES (Sigma,  
109 Tokyo, Japan). After transduction, GFP-positive PG13 cells were sorted using a BD FACS Aria  
110 (BD Biosciences, Tokyo, Japan) into 96-well plates. Highly-proliferative cells were amplified  
111 and harvested. Proviral cDNA expression was confirmed by RT-PCR. Total RNA was extracted  
112 using RNeasy (Qiagen, Tokyo, japan), and the cDNA was synthesized using the Transcriptor  
113 High Fidelity cDNA Synthesis Kit (Roche, Tokyo, Japan). PCR was performed with the ExTaq  
114 Hot Start Version (Takara). All reactions were carried out with 25 ng cDNA (total RNA  
115 equivalent) and 0.5 U of ExTaq Hot Start Version (Takara) in a volume of 20 µl. The final  
116 concentrations of the other reactants were: 1x ExTaq Buffer, 0.2 mM each dNTP, 5% DMSO  
117 and 0.5 µM of each primer (forward primer 5′-CCCTCAAAGTAGACGGCATCGC-3′ and

118 reverse primer 5'- TACAGGTGGGGTCTTTCATTCCC-3'). The PCR cycling conditions were  
119 as follows: initial denaturation at 94°C for 2 min followed by 40 cycles of 94°C for 20 s, 72°C  
120 for 90 s, and a final extension at 72°C for 5 min. Amplification was performed using a PCR  
121 Thermal Cycler Dice (Takara). The PCR products were analyzed by 1.5% agarose gel  
122 electrophoresis in TBE buffer. In this manner, PG13/OSKMG cell lines that have all proviral  
123 DNAs (*Oct3/4*, *Sox2*, *Klf4*, *c-Myc* and *GFP*) were established.

124

#### 125 **Concentration of PG13 retrovirus**

126 Established PG13/OSKMG cells were cultured in DMEM-high glucose  
127 supplemented with 20% FBS, 50 U/ml Penicillin and 50 µg/ml Streptomycin (D20 medium) at  
128 37°C in 10% CO<sub>2</sub>. PG13/OSKMG cells were seeded in 15 cm dishes at a density of 6.75×10<sup>6</sup>  
129 cells/dish. After 3 days of culture, the medium was replaced with fresh medium (D10 medium)  
130 for virus production. After 12 h of incubation, the supernatant was harvested and filtered. The  
131 supernatant was incubated on ice for 30 min. The chilled supernatant was diluted three times  
132 with 4×PEG solution (32% PEG6000 (TOHO Chemical Industry, Tokyo, Japan)/400 mM  
133 NaCl/40 mM HEPES, pH7.4) and incubated at 4°C for 3 h. After this incubation, the

134 supernatant was centrifuged at 2000×g for 30 min. The supernatant was discarded and the pellet  
135 was centrifuged at 2000×g for 5 min again to remove residual supernatant. The final supernatant  
136 was removed, and the pellet was resuspended in 1/100<sup>th</sup> of the original volume of DMEM and  
137 stored at -80°C.

138

139 **Establishment of the 293FT/CD40L cell line and preparation of a highly concentrated**  
140 **CD40L supernatant**

141 Self-inactivating lentiviral vectors were produced by transient transfection of 293FT  
142 cells with the vector plasmid pRRLsin hEF1a-CD40L-IRES Kusabira Orange cPPT, the  
143 lentiviral packaging constructs pRSV/REV and pMDLG/pRRE, and the vesicular stomatitis  
144 virus glycoprotein (VSV-G)-expressing plasmid pcDNA3-VSVG using the calcium phosphate  
145 method. 293FT cells were transduced with concentrated lentiviruses in the presence of 8 µg/ml  
146 polybrene. After 5 days, Kusabira Orange-positive cells were sorted using a  
147 fluorescence-activated cell sorter and were inoculated into a 96 well plate coated with  
148 poly-L-lysine (Cellvis, Mountain View, CA, USA).

149 Established 293FT/CD40L-IRES-KO cells were cultured in DMEM-high glucose



150 supplemented with 10% FBS, 50 U/ml Penicillin and 50 µg/ml Streptomycin (D10 medium) at  
151 37°C in 10% CO<sub>2</sub>. 293FT/CD40L-IRES-KO cells were seeded in 15 cm dishes at a density of  
152 6.75×10<sup>6</sup> cells/dish. After 3 days of culture, the medium was replaced with fresh medium (D10  
153 medium) for virus production. After 24 h of incubation, the supernatant was harvested and  
154 filtered. The supernatant was incubated on ice for 30 min. The chilled supernatant was diluted  
155 three times with 4×PEG solution (32% PEG6000/ 400 mM NaCl/ 40 mM HEPES, pH7.4) and  
156 incubated at 4°C for 3 h. After this incubation, the supernatant was centrifuged at 2000×g for 30  
157 min. The supernatant was discarded and the pellet was centrifuged at 2000×g for 5 min again to  
158 remove residual supernatant. The final supernatant was removed, and the pellet was  
159 resuspended in 1/100<sup>th</sup> of the original volume of the B cell medium (see below) and stored at  
160 -80°C.

161

#### 162 **Generation of the BiPSC, MIB2-6, from peripheral B cells**

163 Peripheral blood (30 ml) was obtained from healthy donors and mononuclear (MNC)  
164 cells were separated by density-gradient centrifugation using Ficoll-Paque PLUS (GE  
165 Healthcare, Tokyo, Japan). MNCs were cultured in Iscove's Modified Dulbecco's Medium

166 (IMDM) (Life Technologies, Funabashi, Japan) supplemented with 10% fetal bovine serum  
167 (FBS) (Equitech-Bio, Kerrville, TX, USA)/PS: Penicillin (50 U/ml) and Streptomycin (50  
168 µg/ml) (Nacalai Tesque, Kyoto, Japan)/L-glutamine (4 mM) (Life Technologies, Funabashi,  
169 Japan) (B cell medium) in the presence of IL-4 (4 ng/ml, Peprotech) and cyclosporine A  
170 (0.7µg/ml) (Tokyo Chemical Industry, Tokyo, Japan). B cells were purified using  
171 magnetic-activated cell sorting CD19 Micro Beads (Miltenyi Biotec, Auburn, CA, USA)  
172 according to the manufacturer's instructions. The procedure for the generation of BiPSC after  
173 the purification of B cells to generate BiPSC is described in the Materials and Methods section  
174 of manuscript. In this way, Inaki et al. established the B cell derived induced pluripotent stem  
175 cells (iPSCs), MIB2-6.

176

#### 177 **Dicentric chromosome assay (DCA)**

178 Two different BiPSC cultures in which AID expression was controlled by the  
179 Tet-Off system were cultured in BiPSC medium with doxycycline in 6-well plates. After  
180 two rounds of washing with PBS and incubation in BiPSC medium for 2 h, duplicate  
181 BiPSC cultures were then incubated for 10 days in BiPSC medium without doxycycline.

182 Colcemid (final concentration, 0.05 µg/ml; Life Technologies) was added 4 h before cell  
183 harvesting. BiPSCs were dissociated into single cells by treatment with Accumax  
184 (Funakoshi, Tokyo, Japan) and a cell strainer, and then cell harvesting and Giemsa  
185 staining was performed according to our previously reported methods.<sup>4</sup>

186

### 187 **Cell proliferation assay**

188           The Cell Counting Kit-8 (called the ‘WST-8 assay’ in this paper) (Dojindo  
189 Laboratories, Kumamoto, Japan) was used for the assay of cell proliferation, according to the  
190 manufacturer’s instructions. Cells were seeded at a density of  $1.0 \times 10^5$ /ml, in a final volume of  
191 100 µl in 96-well flat-bottom plates (CORNING, Corning, NY, USA) in triplicate. The plates  
192 were incubated at 37°C in a 5% CO<sub>2</sub> incubator for 1 to 7 days. At the end of the incubation, 10  
193 µl of the WST-8 reagent was added to each well and the plates were incubated for 4 h.  
194 Absorbance for 450 nm was then measured using a plate reader (Multiskan FC; Thermo Fisher  
195 Scientific, Tokyo, Japan).

196

### 197 **Analysis of EBV infection**

198                    PCR analysis of the DNA extracted from the BiPSCs was performed with SL18 and  
199   SL19 primers to the tandem repeat region of the gene for latent membrane 1 (LMP-1) to detect  
200   EBV infection as previously reported.<sup>5</sup>  
201

## References

202

203

204 1. Kaneko, S., Onodera, M., Fujiki, Y., Nagasawa, T. & Nakauchi, H. Simplified retroviral  
205 vector gcsap with murine stem cell virus long terminal repeat allows high and continued  
206 expression of enhanced green fluorescent protein by human hematopoietic progenitors  
207 engrafted in nonobese diabetic/severe combined immunodeficient mice. *Hum Gene Ther.*  
208 12, 35-44 (2001).

209 2. Takahashi, K. *et al.* Induction of pluripotent stem cells from adult human fibroblasts by  
210 defined factors. *Cell.* 131, 861-72 (2007).

211 3. Inaki, M., Kato, D., Utsugi, T., Onoda, F., Hanaoka, F. & Murakami, Y. Genetic analyses  
212 using a mouse cell cycle mutant identifies magoh as a novel gene involved in Cdk  
213 regulation. *Genes Cells.* 16, 166-78 (2011).

214 4. Abe, Y. *et al.* Increase in dicentric chromosome formation after a single CT scan in adults.  
215 *Sci Rep.* 5, 13882 (2015).

216 5. Shibata, D., Weiss, L. M., Nathwani, B. N, Brynes, R. K. & Levine, A. M. Epstein-Barr  
217 virus in benign lymph node biopsies from individuals infected with the human  
218 immunodeficiency virus is associated with concurrent or subsequent development of  
219 non-Hodgkin's lymphoma. *Blood.* 77, 1527-33 (1991).

220

## Legends

221

222

223 **Table S1. Primer sequences.**

224

225 **Figure S1. Characterization of the B cell derived iPSC, MIB2-6.**

226 (a) Colony-formation of MIB2-6.

227 (b) Normal G-banding karyotype of MIB2-6.

228 (c) Hematoxylin-eosin stained teratoma derived from MIB2-6.

229

230 **Figure S2. Detection of monoclonal immunoglobulin heavy (IgH) gene rearrangements in**  
231 **MIB2-6 cells.**

232 Monoclonal VDJ rearrangements of the IgH gene (arrows) were detected in MIB2-6  
233 using PCR.

234

235 **Figure S3. Phenotype analysis of BiPSCs.**

236 The cell phenotypes of (a) BiPSC13 and (b) MIB2-6 were analyzed using flow cytometry and  
237 the indicated antibodies.

238

239 **Figure S4. qRT-PCR analysis of AID expression in MIB2-6 induced by the**  
240 **doxycycline-controlled (Tet-off) system.**

241 AID expression in MIB2-6#17 in the absence (a) and the presence (b) of doxycycline was  
242 measured using qRT-PCR. The numbers on the Y axis are the expression of AID mRNA  
243 standardized by the expression of GAPDH relative to the expression of AID mRNA of CD19<sup>+</sup>  
244 normal B cells. Data were analyzed in triplicates and normalized to glyceraldehyde  
245 3-phosphate dehydrogenase.

246

247 **Figure S5. AID expression depending on the number of days after removeing doxycycline**  
248 **by immunofluorescence staining.**

249 Expression of AID was detected in BiPSC13#1 at 2 days (a) and in MIB2-6#17 at 3 days,  
250 respectively.

251

252 **Figure S6. Effect of the absence or presence of doxycycline on cell proliferation.**

253 The cell proliferation of (a) BiPSC13#2 and (b) MIB2-6#17 was measured in the presence

254 (white circles) or absence (black circles) of doxycycline. Results are expressed as mean  $\pm$  SD  
255 of triplicate experiments.

256

257 **Figure S7. Hematopoietic differentiation from MIB2-6 with AID expression induced using**  
258 **the doxycycline-controlled (Tet-off) system.**

259 (a) Flow cytometric analysis of the cell phenotype after differentiation of MIB2-6#17-AID into  
260 HSCs. The population of CD34-positive cells is surrounded by a dotted line. (A)  
261 MIB2-6#17-AID were cultured in the presence of doxycycline, (B) MIB2-6#17-AID were  
262 cultured in the presence of doxycycline and then doxycycline was withdrawn 10 days before  
263 sorting of the CD34-positive cells, and (C) MIB2-6#17-AID were cultured in the absence of  
264 doxycycline to express AID constitutively.

265 (b) Immunofluorescence analysis of the expression of AID in the sorted CD34-positive cells.  
266 AID expressed cells were detected in (B) and (C). Arrow heads and arrows indicate  
267 AID-positive or -negative cells, respectively. Culture condition of (A), (B), and (C) are as  
268 described in (a).

269

Table S1. Primer Sequences

| Primer (Exo from plasmid vector) | Sequence (5' to 3')                       | Applications                 |
|----------------------------------|-------------------------------------------|------------------------------|
| hOCT3/4-S944                     | CCC CAG GGC CCC ATT TTG GTA CC            | OCT3/4 Tg genomic and RT-PCR |
| hSOX2-S691                       | GGC ACC CCT GGC ATG GCT CTT GGC TC        | SOX2 Tg genomic and RT-PCR   |
| hKLF4-S1128                      | ACG ATC GTG GCC CCG GAA AAG GAC C         | Tg genomic and RT-PCR        |
| hMYC-S1011                       | CAA CAA CCG AAA ATG CAC CAG CCC CAG       | c-MYC Tg genomic and RT-PCR  |
| pGCsap-AS1                       | GGG TCT TTC ATT CCC CCC TTT TTC TGG AGA C | Tg genomic and RT-PCR        |
| Primer (Endogenous RNA)          | Sequence (5' to 3')                       | Applications                 |
| GAPDH-F                          | GGT GAA GGT CGG AGT CAA CG                | Endo GAPDH RT-PCR            |
| GAPDH-R                          | AAT TTG CCA TGG GTG GAA TC                | Endo GAPDH RT-PCR            |
| hOCT3/4-S1165                    | GAC AGG GGG AGG GGA GGA GCT AGG           | Endo OCT3/4 RT-PCR           |
| hOCT3/4-AS1283                   | CTT CCC TCC AAC CAG TTG CCC CAA AC        | Endo OCT3/4 RT-PCR           |
| hSOX2-S1430                      | GGG AAA TGG GAG GGG TGC AAA AGA GG        | Endo SOX2 RT-PCR             |
| hSOX2-AS1555                     | TTG CGT GAG TGT GGA TGG GAT TGG TG        | Endo SOX2 RT-PCR             |
| hKlf4-sk F                       | CCC ACA CAG GTG AGA AAC CT                | Endo Klf4 RT-PCR             |
| hKlf4-sk R                       | ATG TGT AAG GCG AGG TGG TC                | Endo Klf4 RT-PCR             |
| hMYC-S253                        | GCG TCC TGG GAA GGG AGA TCC GGA GC        | Endo c-MYC RT-PCR            |
| hMYC-AS555                       | TTG AGG GGC ATC GTC GCG GGA GGC TG        | Endo c-MYC RT-PCR            |
| AIDrtPCR-F                       | AAA ATG TCC GCT GGG CTA AG                | Endo AICDA RT-PCR            |
| AIDrtPCR-R                       | AGG TCC CAG TCC GAG ATG TAG               | Endo AICDA RT-PCR            |
| Pax-S                            | AAT GAC ACC GTG CCT AGC GT                | Endo PAX RT-PCR              |
| Pax-AS                           | GGT GGT GAA GAT GTC TGA GT                | Endo PAX RT-PCR              |



Figure S1

(a)

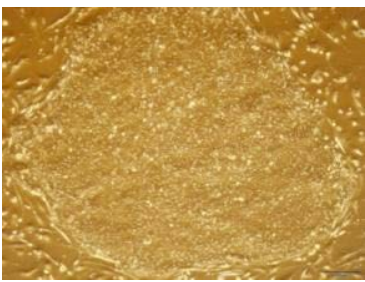

(b)

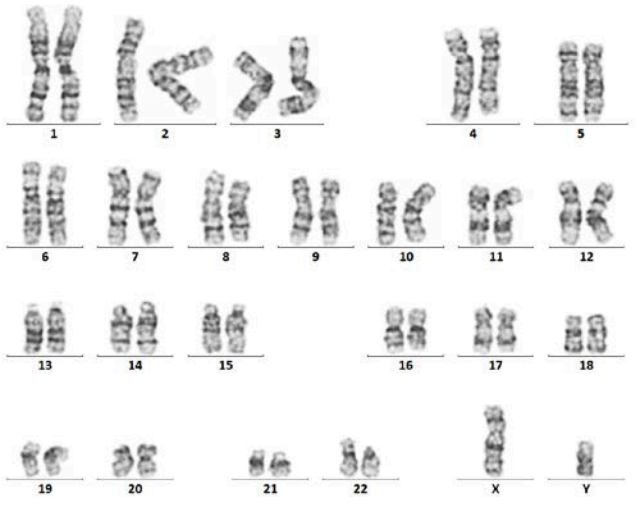

(c)

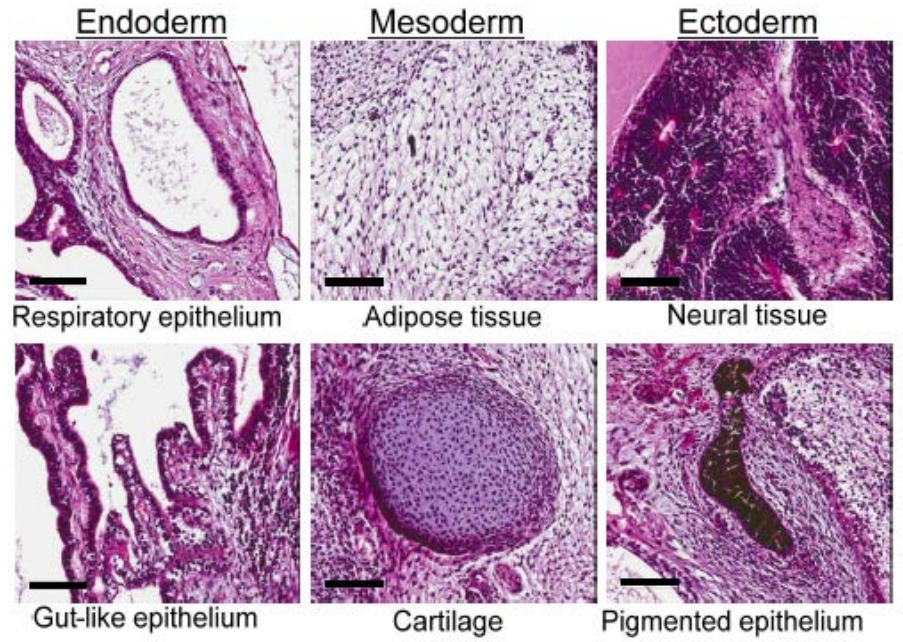

Figure S2

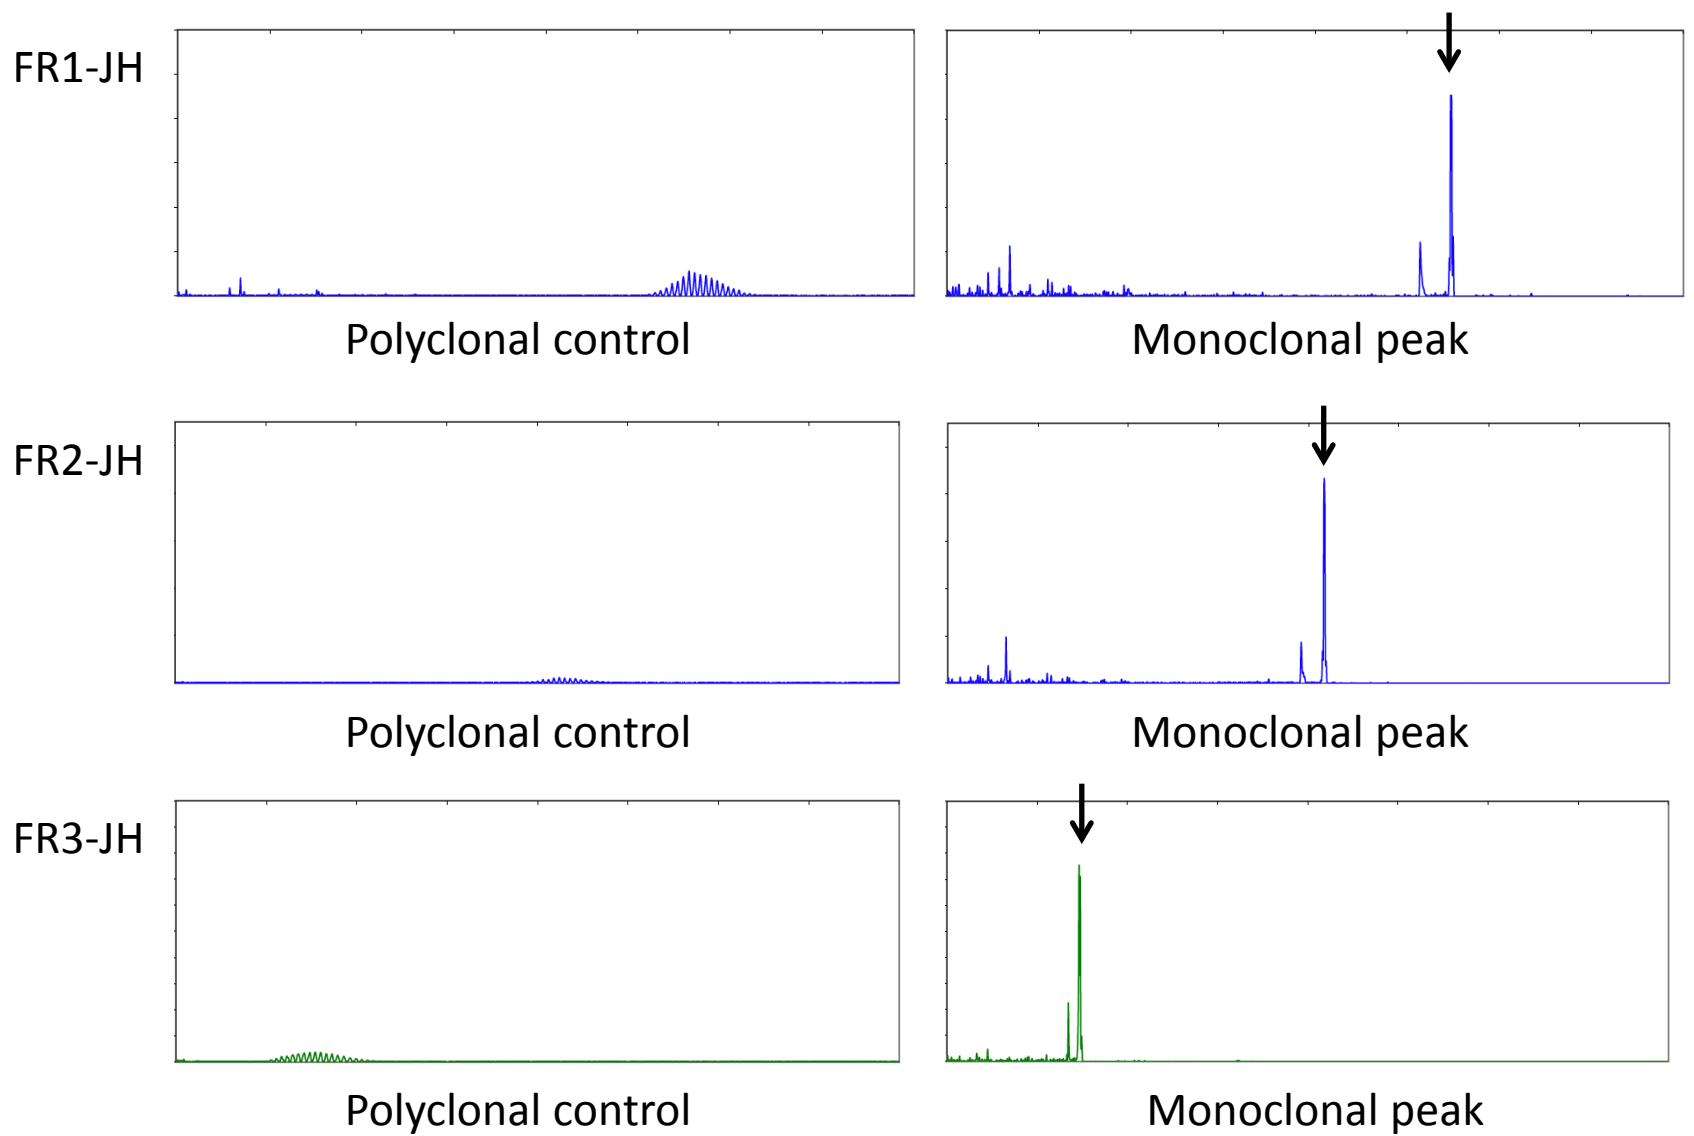

Figure S3

(a)

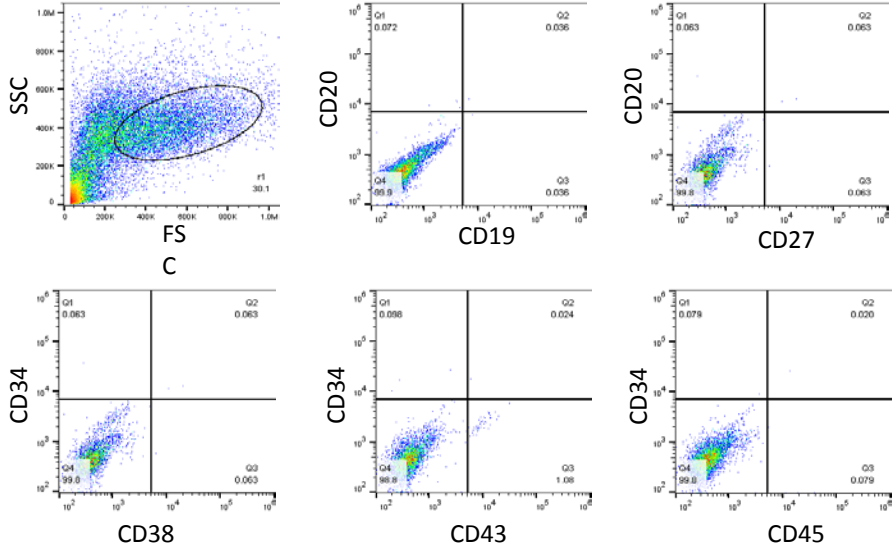

(b)

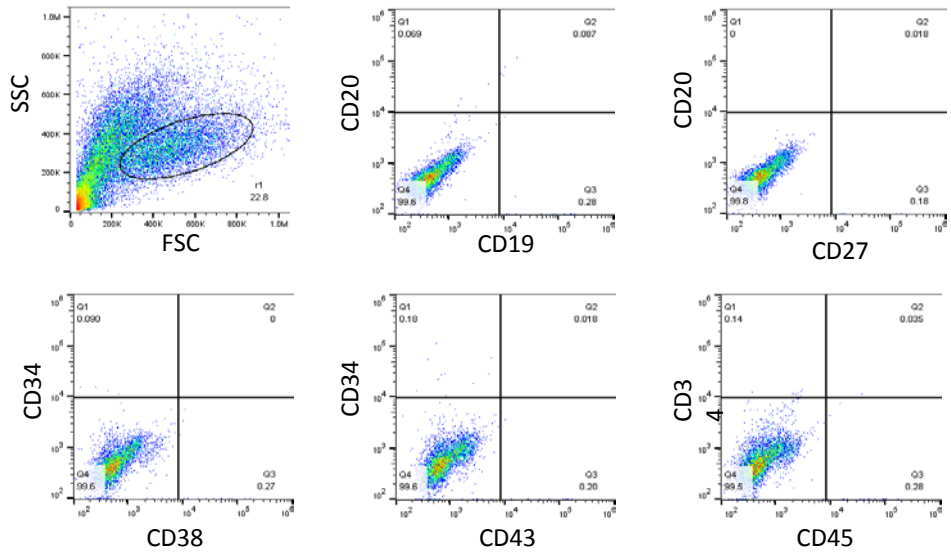

Figure S4

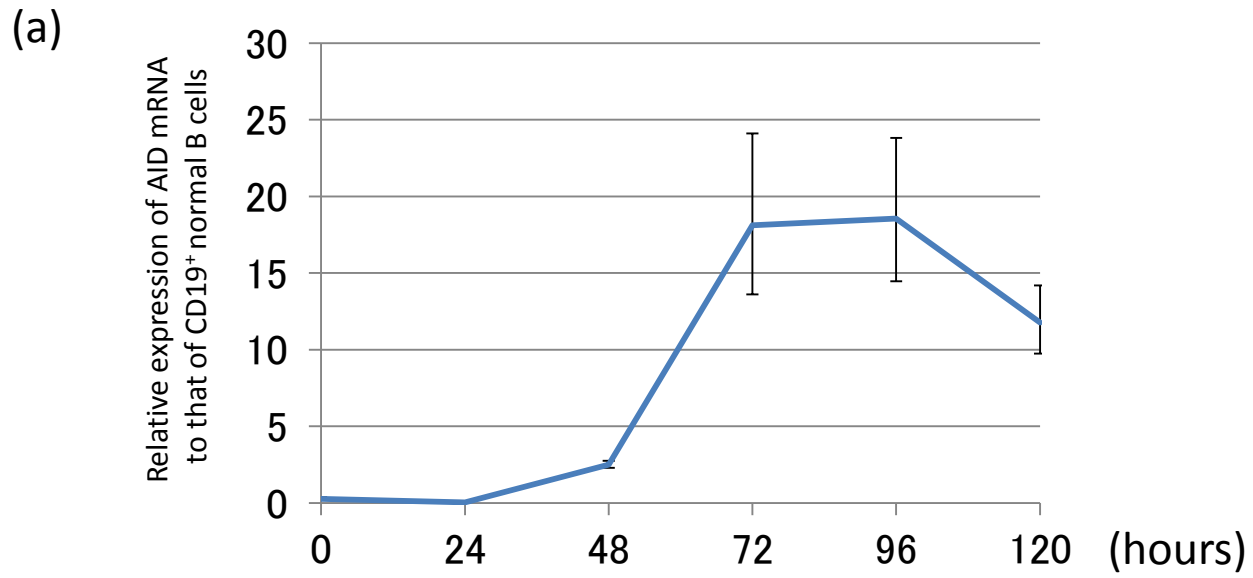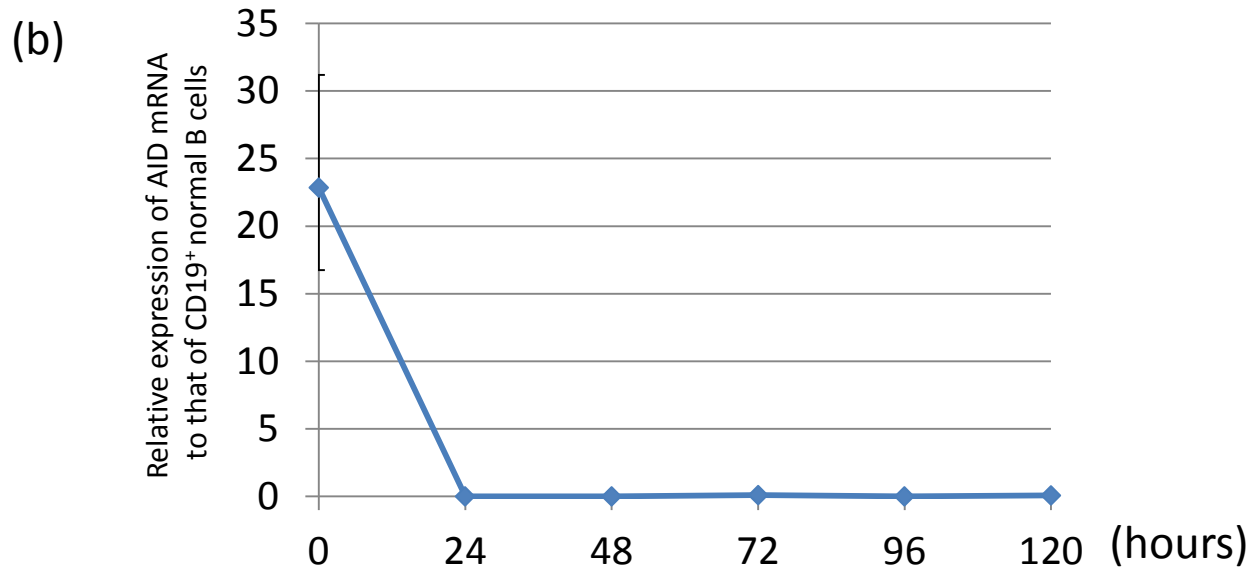

Figure S5

(a)

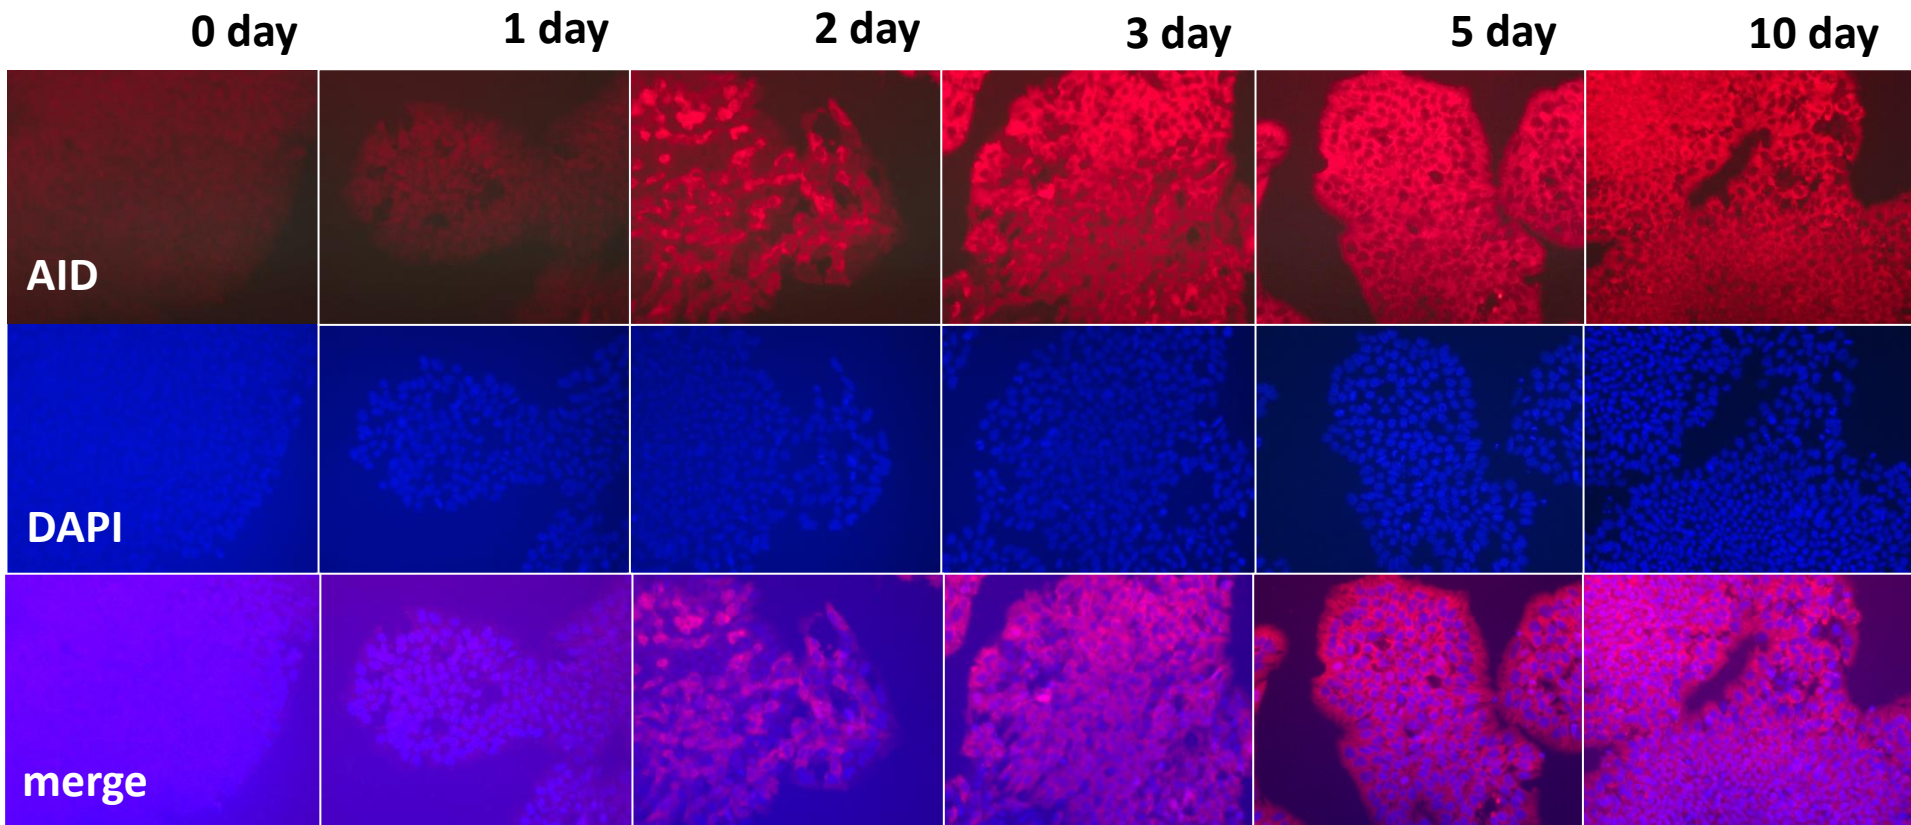



Figure S5

(b)

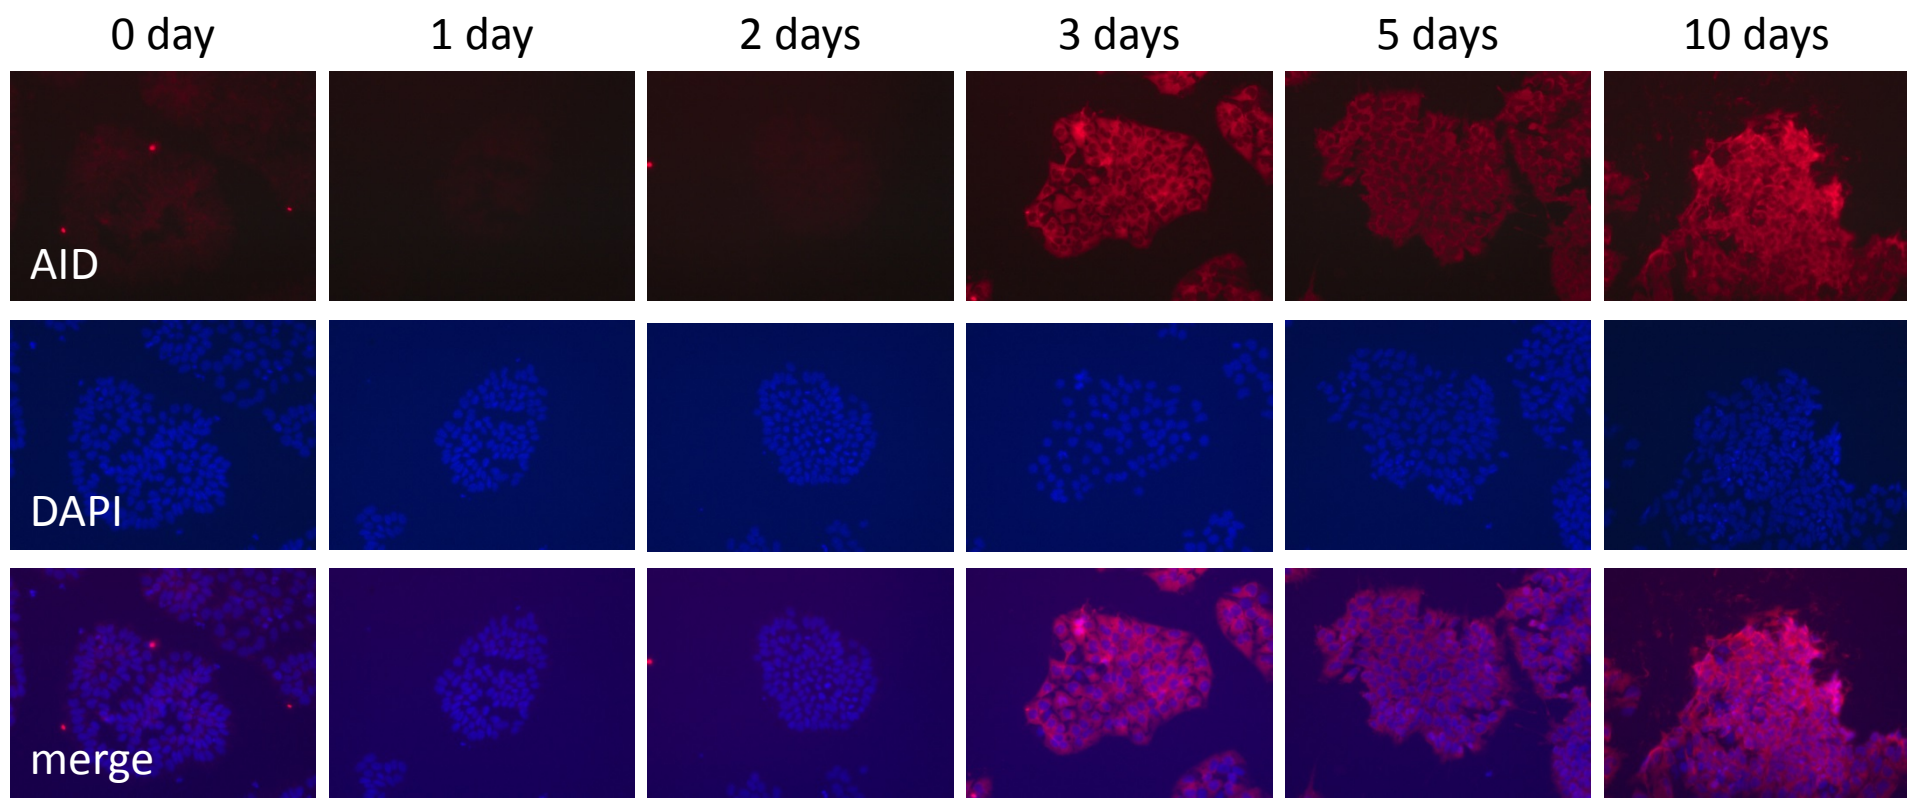

Figure S6

(a)

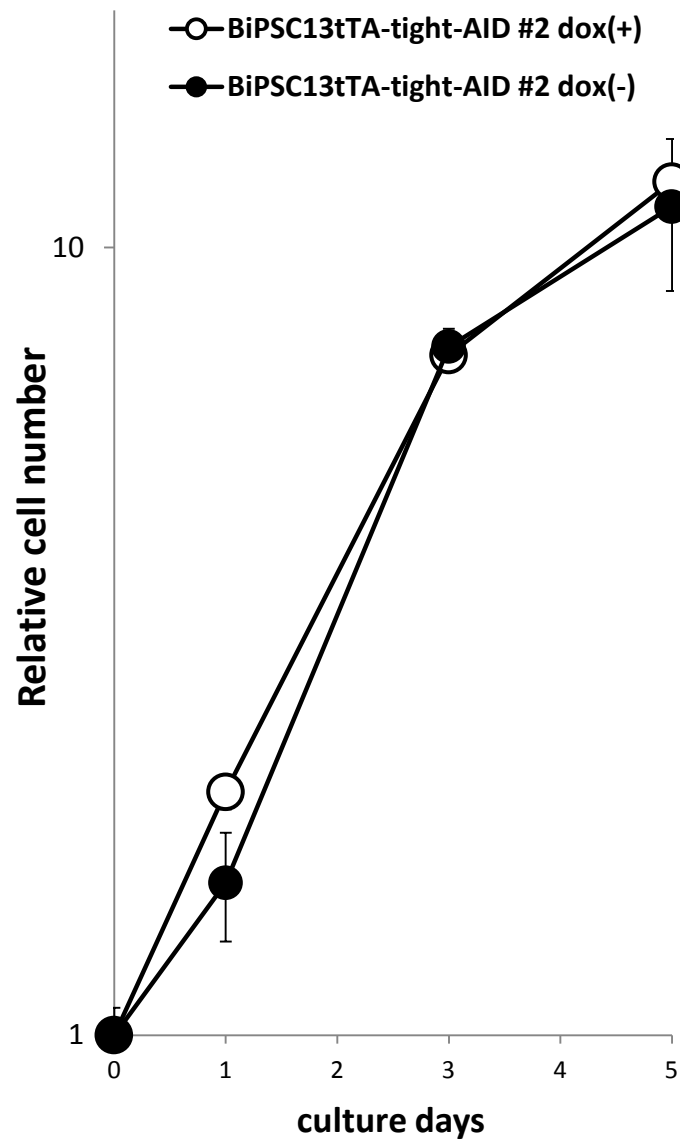

(b)

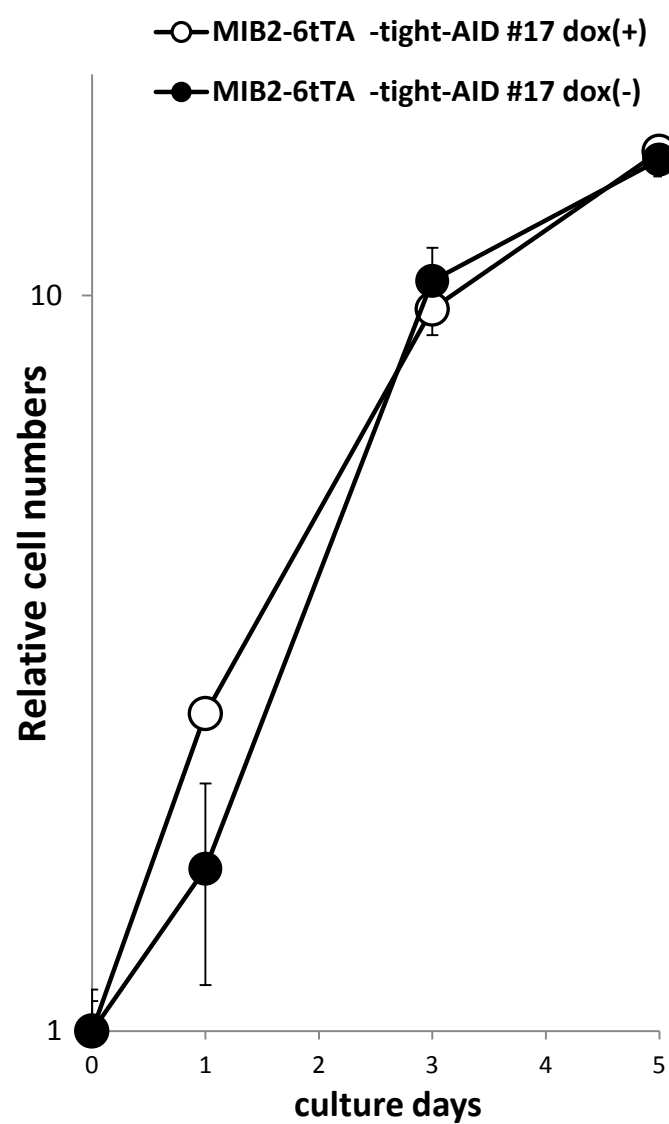

Figure S7

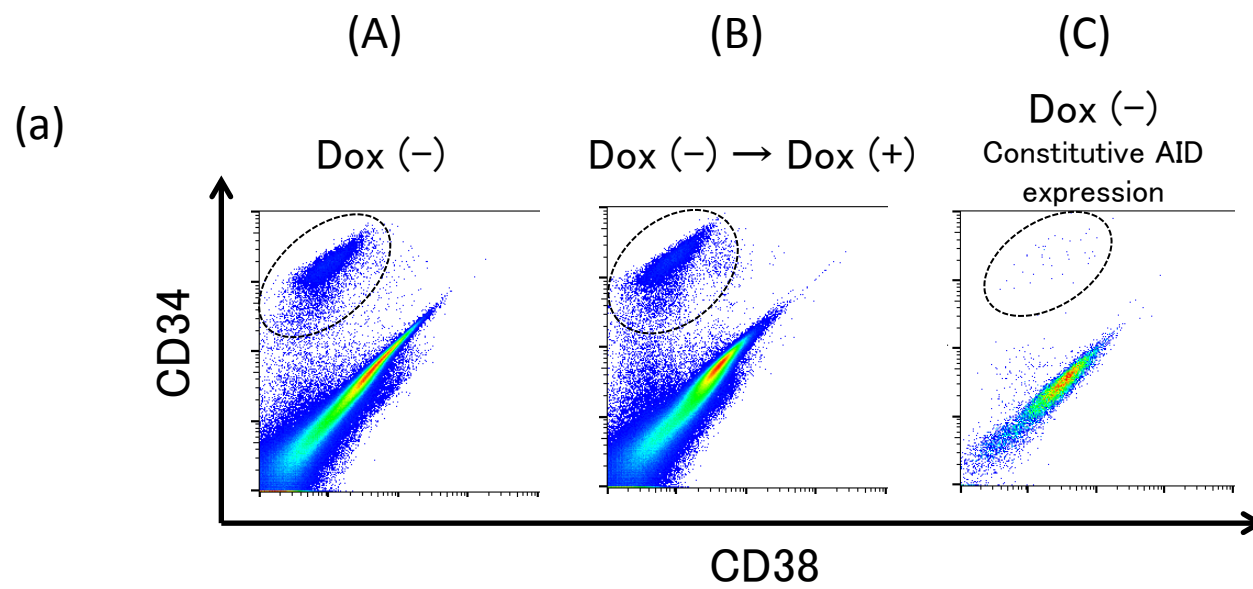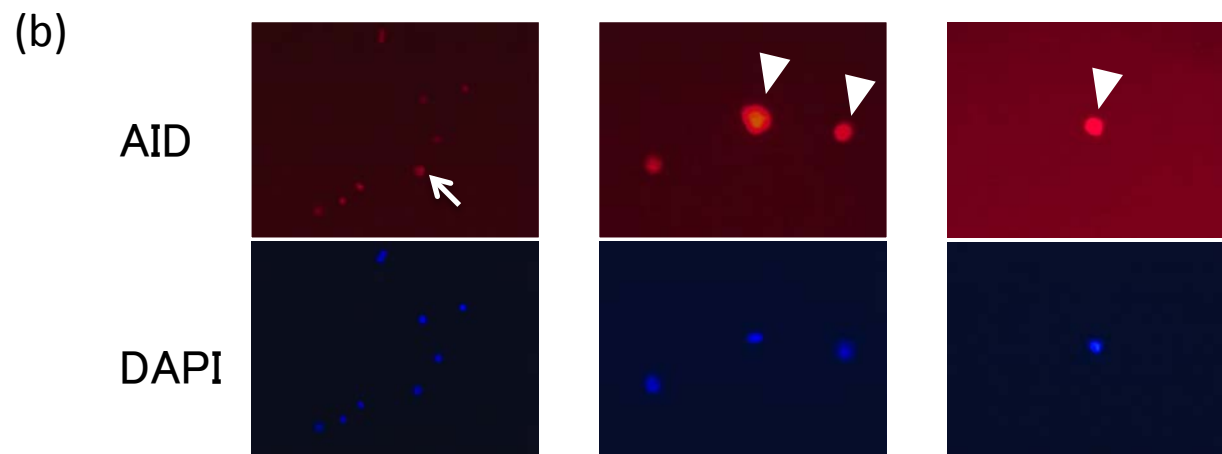

Supplement: 41598_2017_1627_MOESM1_ESM.pdf [file 41598_2017_1627_MOESM1_ESM.pdf]
